# Supplementary material
Source: Springer Nature journal article supplement (https://www.springermedizin.de/resource/supplementary/12958_2010_686_MOESM2_ESM.pdf/9568584)

KGN

SVOG

A

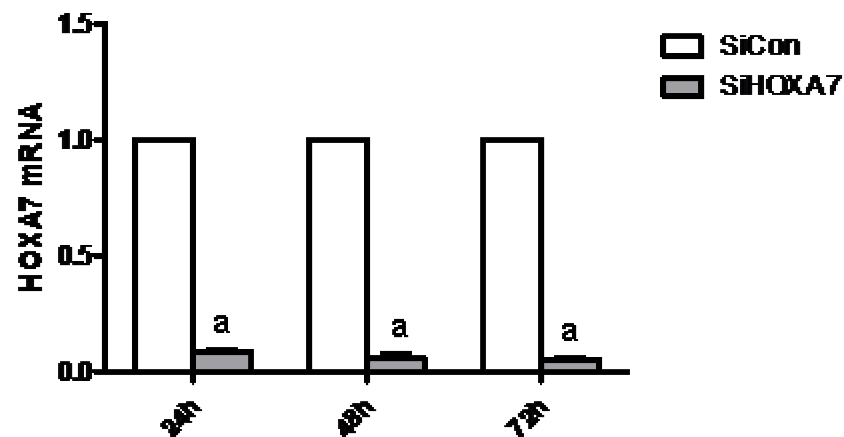

B

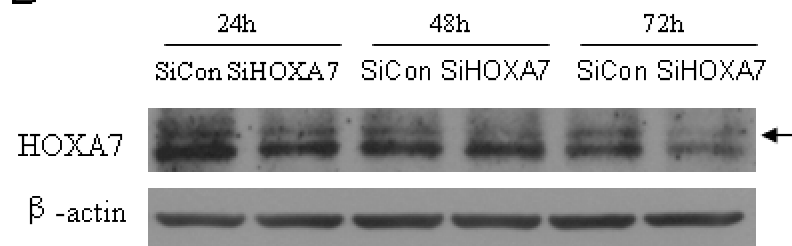

C

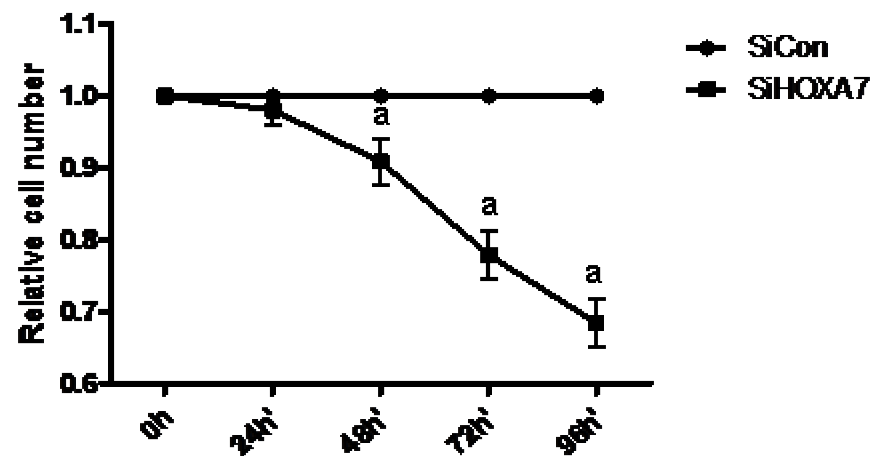

D

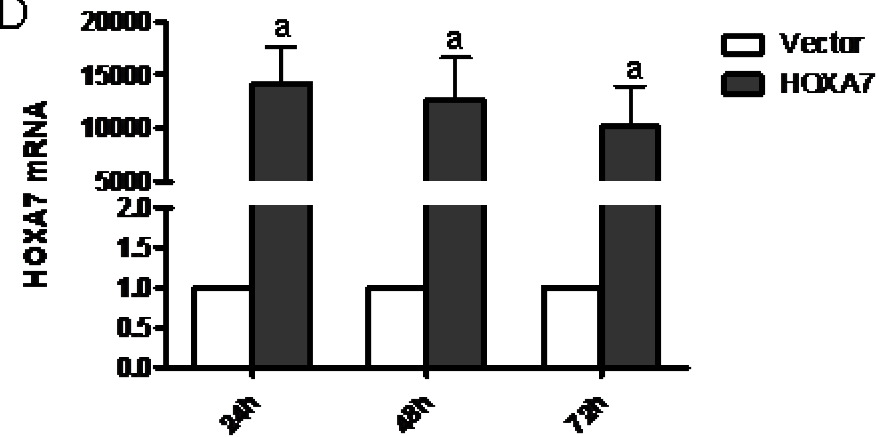

E

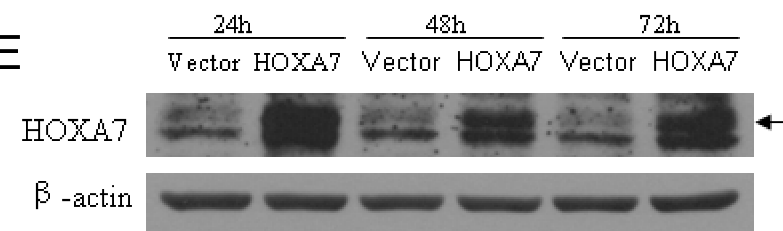

F

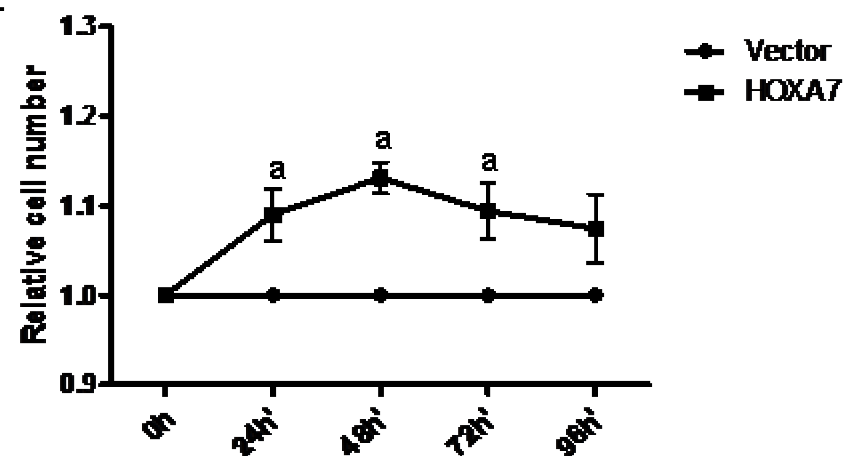

Supplement: MOESM2 [file 9568584]
